# Supplementary material
Source: publisher figshare collection journal article supplement (https://aacr.figshare.com/articles/dataset/_/22455995)

**Figure S4. Concentrations of products in the liver of mice (N = 3) given irinotecan or IMMU-132 determined in 2 separate studies.** (A) Data derived from Study 1. SN-38G levels were detectable only 1 or 2 mice of the irinotecan-treated group at 1, 2, and 6 h. Study 2 only examined select intervals (1 and 6 h for irinotecan and 1, 6, and 24 h for IMMU-132). (B) and (C) provide the data from Study 2 with comparison to the data at the same intervals from Study 1, illustrating the similarities or differences in the 2 data sets.

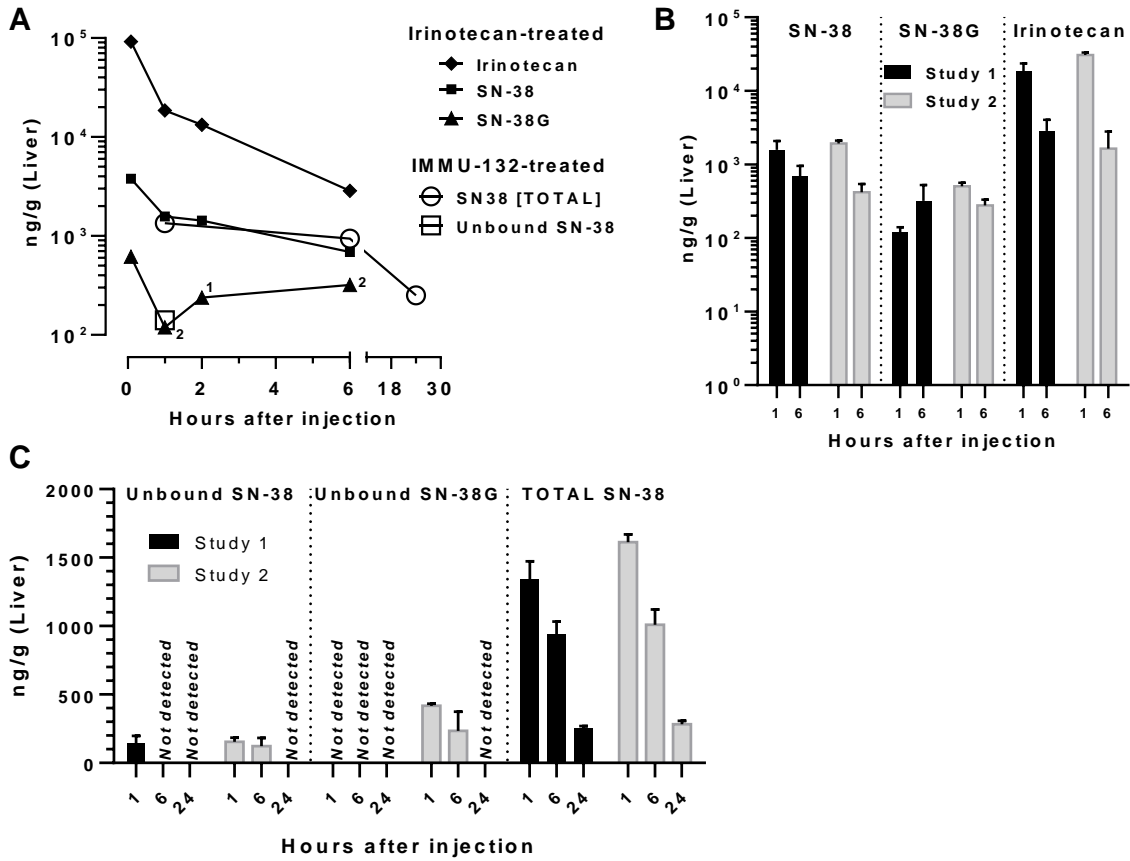

Supplement: Supplementary file 1 [file 39907151]
